# Supplementary material for: What We Learned about the Feasibility of Gene Electrotransfer for Vaccination on a Model of COVID-19 Vaccine
Source: MDPI journal article supplement (doi:10.3390/pharmaceutics15071981), 2023-07-19
Supplement: s1 [file s1]

# What We Learned about the Feasibility of Gene Electrotransfer for Vaccination on a Model of COVID-19 Vaccine

Supplementary data

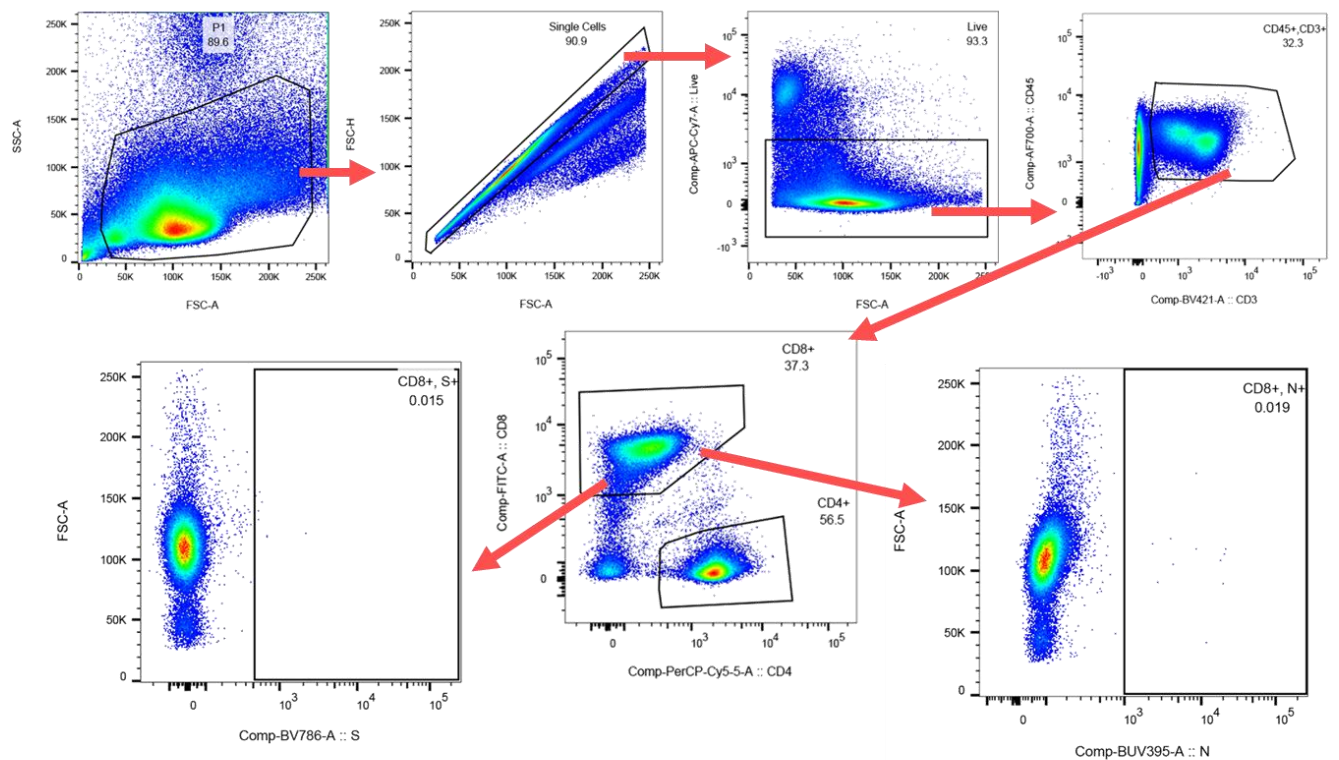

Supplementary Figure S1. Flow cytometry gating strategy.

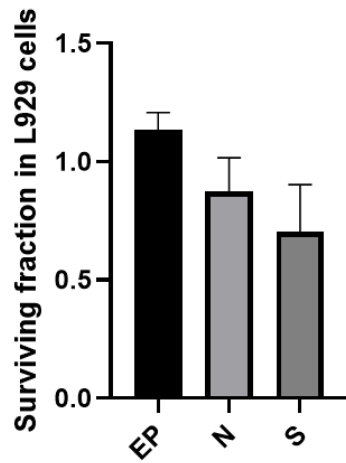

(a)

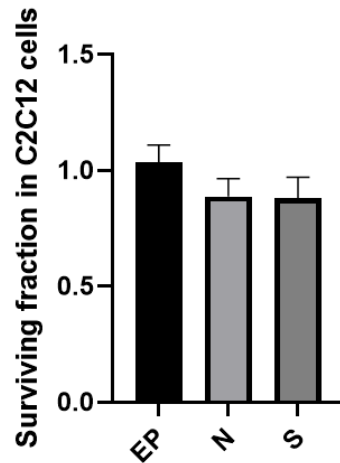

(b)

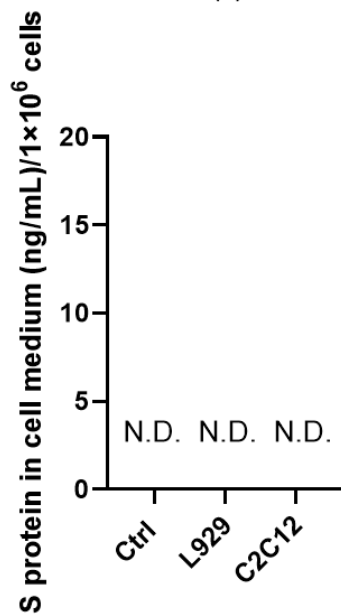

(c)

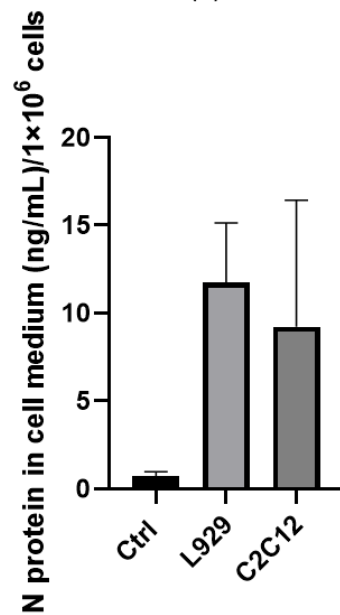

(d)

**Supplementary Figure S2.** In vitro survival and cell-medium S and N protein concentration after vitro GET to L929 fibroblasts and C2C12 myoblasts: (a) Survival after GET in L929 cells; (b) Survival after GET in C2C12 cells. (c) Concentration of S protein in cell medium; (d) Concentration of N protein in cell medium. Graph bars represent the mean with standard error of the mean (SEM) of three independent experiments with 3 technical replicates. EP, electroporation alone, GET of pN plasmid, pS, GET of pS plasmid. Ctrl, non-transfected cells; N.D., not detected.

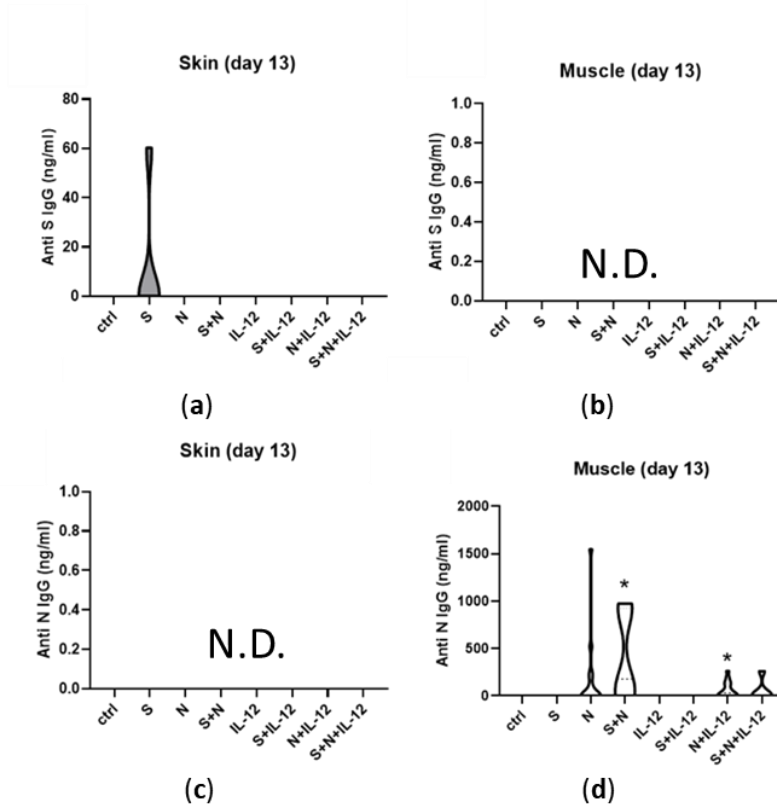

**Supplementary Figure S3.** Induction of specific IgG antibodies against the transfected S and N antigens in the blood serum of the vaccinated mice 13 days after the first vaccine dose: **(a)** Concentration of anti-S IgG antibodies after skin vaccination; **(b)** Concentration of anti-S IgG antibodies after muscle vaccination; **(c)** Concentration of anti-N IgG antibodies after skin vaccination; **(d)** Concentration of anti-N IgG antibodies after muscle vaccination. Results are presented as violin plots showing data distribution. 5-10 animals per group. Ctrl, nontreated mice. One-way ANOVA vs Ctrl: \*,  $P \leq 0.05$ . N.D., not detected.
